# Supplementary material
Source: PubMed Central journal article supplement (PMC4984998)
Supplement: NIHMS809411-supplement-01.pdf [file NIHMS809411-supplement-01.pdf]

### PDZ-BAR domain

PICK1 SAXS-derived model (Madasu et al., *Mol Biol Cell* 2015)

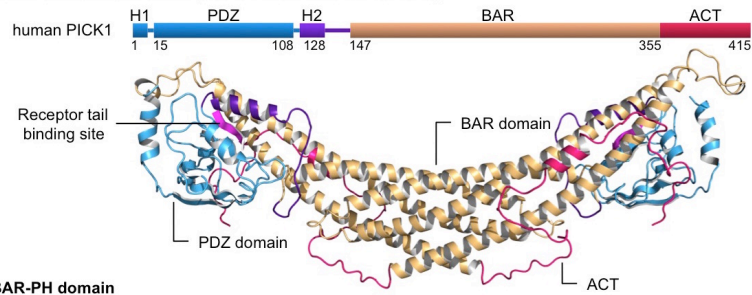

### BAR-PH domain

PDB code: 4H8S (2.6 Å resolution)  
APPL1 (Zhu et al., *EMBO J* 2007; Li et al., *Structure* 2007)  
APPL2 (King et al., *J Biol Chem* 2012)  
Other PDB entries: 2Q13, 2ELB, 2Z0O, 2ELB, 4H8S

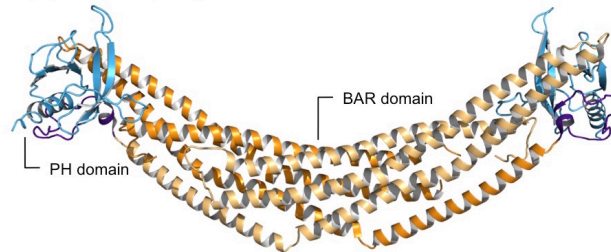

### PX-BAR domain

PDB code: 2RAJ (2.45 Å resolution)  
Sorting Nexin 9 (Plypenko et al., *EMBO J* 2007; Wang et al., *Structure* 2008 )  
Sortin Nexin 33 (To be published)  
Other PDB entries: 2RAI, 2RAK, 3DYT, 4AKV

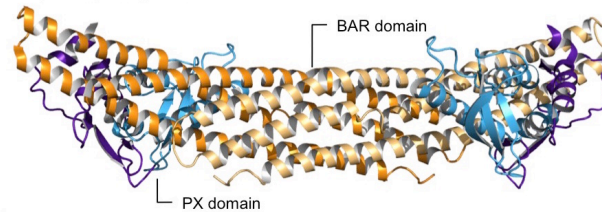

### F-BAR-SH3 domain

PDB code: 2X3W (2.64 Å resolution). Only one SH3 domain is resolved in the crystals. Second SH3 added by symmetry  
Syndapin 1 (Rao et al. *Proc Natl Acad Sci USA* 2010)

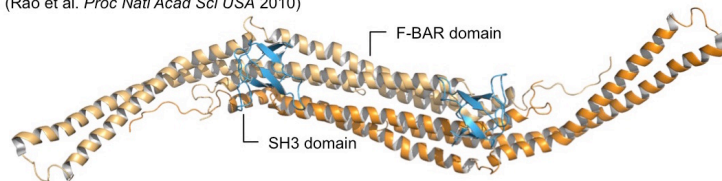

### BAR-GTPase complex

PDB code: 4DCN (3.0 Å resolution)  
Arfaptin2 in complex with GTPase Arl2 (Nakamura et al. *J Biol Chem* 2012)

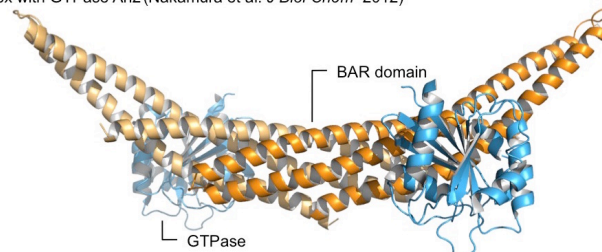

**Figure S1. Structures of BAR domain proteins featuring accessory domains.** Color scheme: BAR domains – two shades of orange, accessory domains – cyan, inter-domain sequences – purple. Also shown for comparison is our SAXS-derived model of PICK1. PDB accession codes and references are listed with each structure.
